# Supplementary material
Source: PubMed Central journal article supplement (PMC2186246)

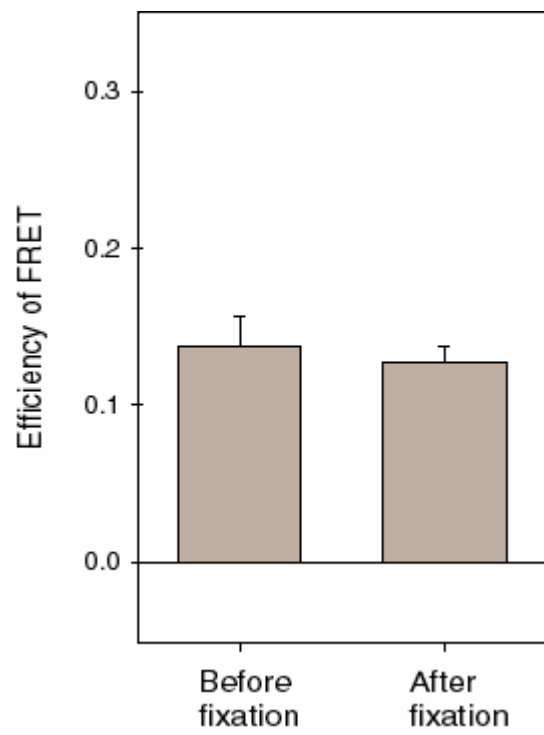

(Förster distance 7.4 nm)

Supplementary figure 1

Supplement: mmc2.pdf [file mmc2.pdf]
